# Supplementary material for: Injectable Thermosensitive Formulation Based on Polyurethane Hydrogel/Mesoporous Glasses for Sustained Co-Delivery of Functional Ions and Drugs
Source: PubMed Central journal article supplement (PMC6835912; doi:10.3390/pharmaceutics11100501), 2019-10-01
Supplement: pharmaceutics-11-00501-s001.pdf [file pharmaceutics-11-00501-s001.pdf]

# Supplementary Materials: Injectable Thermosensitive Formulation Based on Polyurethane Hydrogel/Mesoporous Glasses for Sustained Co-Delivery of Functional Ions and Drugs

Monica Boffito, Carlotta Pontremoli, Sonia Fiorilli, Rossella Laurano, Gianluca Ciardelli and Chiara Vitale-Brovarone

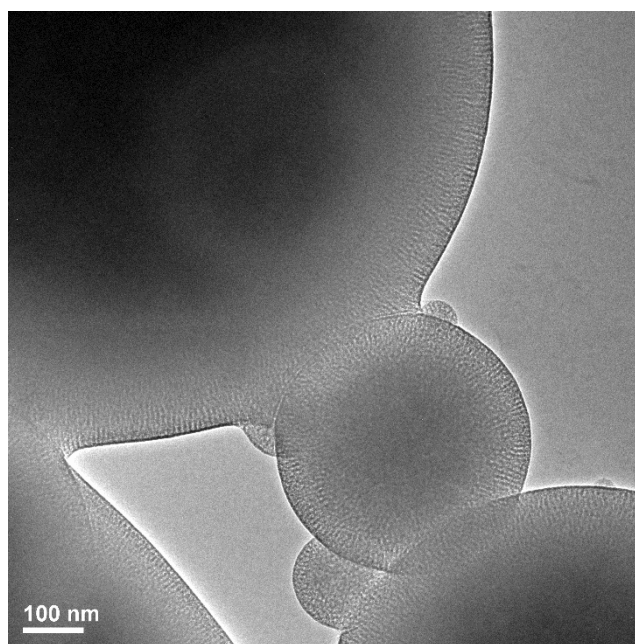

Figure S1. TEM image of MBG\_Cu2%\_SD.
